1 **Title Page:**

2 **Title: Detection of EGFR deletion using unique RepSeq technology**

3

4 **Authors:** Thuraiayah Vinayagamoorthy<sup>1</sup>, ~~Qin Dahui~~Dahui Qin<sup>2</sup>, Fei Ye<sup>3</sup>, Minghao

5 Zhong<sup>3</sup>

6

7 <sup>1</sup> *MultiGEN Diagnostics Inc. 1100, Revolution Mills Drive, Greensboro, NC 27405*

8 <sup>2</sup> *Molecular Diagnostic Lab, Moffitt Cancer Center, 10902 N. McKinley Drive, Tampa, FL*

9 *33612* <sup>3</sup> *Department of Pathology, Westchester Medical Center, Macy Pavilion, Room# 1435*

10 *100 Woods, Rd. Valhalla, NY 10595*

11

12 **Number of text pages, tables and figures:** This manuscript contain 17

13 pages of text, 3 tables and 1 figure with multiple panels.

14

15 **Running head:** Detection of EGFR deletion using unique RepSeq

16 technology

17

18 **Sources of support:** The study was supported by Select MultiGEN Diagnostics

19 Thuraiayah Vinayagamoorthy is an employee of Select MultiGEN Diagnostics Inc.

20 Corresponding Author:

21 Dahui Qin

22 10902 Magnolia Drive, Room 312E,

23 N. McKinley Drive, Tampa, FL 33612

24 Phone: 813-745-1883

25 Email: [dahui.qin@moffitt.org](mailto:dahui.qin@moffitt.org)

26

27

28

## Abstract

29

30 We are reporting a novel sequencing technology, RepSeq (Repetitive Sequence), that has high  
31 sensitivity, specificity and quick turn-around time. This new sequencing technology is  
32 developed by modifying traditional Sanger sequencing technology in several aspects. The first,  
33 a homopolymer tail is added to the PCR primer(s), which makes interpreting electropherograms  
34 a lot easier than that in traditional Sanger sequencing. The second, an indicator nucleotide is  
35 added at the 5' end of the homopolymer tail. In the presence of a deletion, the position of the  
36 indicator nucleotide in relation to the wild type confirms the deletion. At the same time, the  
37 indicator of the wild type serves as the internal control. Furthermore, the specific design of the  
38 PCR and/or sequencing primers will specifically enrich/select mutant alleles, which increases  
39 sensitivity and specificity significantly. Based on serial dilution studies, the analytical lower  
40 limit of detection was 1.47 copies. A total of 89 samples were tested for EGFR exon 19  
41 deletion, of which 21 were normal blood samples and 68 were samples previously tested by  
42 either pyrosequencing or TruSeq Next Generation Sequencing Cancer Panel. There was  
43 100% concordance among all the samples tested. RepSeq technology has overcome the  
44 shortcomings of Sanger sequencing and offers an easy-to-use novel sequencing method for  
45 personalized precision medicine.

46

47 Key words. RepSeq, EGFR deletion, Non-small cell lung cancer, pyrosequencing, Afatinib,  
48 Gefitinib, Erlotinib.

49

50

## Introduction

51

52 The detection of somatic mutations in the epidermal growth factor receptor (EGFR) is the  
53 key for choosing first line targeted therapies for treating patients with late stage non-small  
54 cell lung cancer (NSCLC) (1,2,3). EGFR deletion mutations constitute a key component for  
55 the first line of targeted chemotherapy. These deletions are mostly confined to exon 19, from  
56 2230 nt to 2260 nt of the reading frame that corresponds to amino acid changes in the  
57 cytoplasmic domain of the EGFR protein. Based on sample matrix, detection of EGFR deletions  
58 imposes five challenges; being a hyper variable region, the deletion could be anywhere in the  
59 above-mentioned region, there could be multiple deletions of varying number of nucleotides on  
60 the same allele, deletion could be homozygous or heterozygous, the copies of the deletion alleles  
61 could be low, and finally, the mutant allele is usually mixed wild type allele at different ratios.  
62 RepSeq technology has been developed to address most of these challenges. We have selected  
63 the most common exon 19 deletion, EGFR L747-A750, that offers the choice of treatment  
64 with Afatinib, Gefitinib, or Erlotinib (4) as an example to illustrate RepSeq technology. There  
65 are several FDA approved tests and a variety of laboratory developed tests (LDTs) to detect  
66 EGFR exon 19 deletion from clinical samples (5,6). All these tests are based on one of three  
67 major platforms; endpoint PCR, real-time PCR, and sequencing. The sequencing platforms  
68 generate a nucleotide sequence, and are hence considered an accurate confirmation of  
69 mutation detection. There are three commonly used sequencing platforms: Sanger  
70 sequencing, pyrosequencing and next generation sequencing (NGS). Sanger sequencing is the  
71 reference method for detecting EGFR L747\_A750 deletion, with a deletion being  
72 determined by an overlap of the electropherogram sequences from the deletion and the  
73 wild type (7). Such an overlap generates scrambled nucleotide sequences that can be difficult

74 to decipher to make the call on the nucleotide sequence. As an alternative, pyrosequencing is  
75 used routinely to detect EGFR L747\_A750 deletion from FFPE samples (8). The nucleotide  
76 read outs from pyrosequencing require experience to call the results with confidence. Unlike  
77 germline mutations, where the copy number is high, EGFR L747\_A750 is usually a somatic  
78 mutation, and different samples have different mutant to wild type ratios, adding another level  
79 of complexity to detect mutants in the presence of an abundance of wild type EGFR.  
80 To overcome the challenges with Sanger sequencing in determining a true deletion, and  
81 to increase the sensitivity to detect the EGFR L747\_A750 somatic mutation, a new platform  
82 technology, Repseq, was developed. This manuscript presents the evaluation of the EGFR  
83 L747\_A750 detection from FFPE samples and provides a comparison to pyrosequencing and  
84 TruSeq cancer panel (Illumina, USA).

## 85 MATERIALS AND METHODS

### 86 RepSeq platform technology

87 The RepSeq process includes extraction of total DNA from FFPE samples, followed by  
88 amplicon sequencing and analysis by capillary electrophoresis. If the sample carries  
89 a somatic deletion, there will be two amplicons generated, one carrying  
90 the mutant with deletion region, and the other carrying the wild type.  
91 Purified PCR products will be simultaneously sequenced using both wild type and  
92 mutant (deletion)-specific sequencing primers. Positioning of primers for amplification  
93 and sequencing is shown (Figure 1A & 1B). In order to distinguish the deletion from that  
94 of the wild type, RepSeq carries two modifications to Sanger sequencing: (a) the lower PCR  
95 primer carries a three nucleotide (Adenosine-Thymidine-Thymidine) repetitive  
96 sequence with a guanidine nucleotide at its 5' end as an indicator of one end of  
97 the PCR product. (b) Two types of sequencing primers are used, the wild type  
98 sequencing primers and mutant primer. The wild type sequencing primers consist  
99 of two designs: selective and non-selective. The non-selective wild type  
100 sequencing primer anneals to the nucleotide sequence upstream of the deletions  
101 (Figure 1A). The selective wild type sequencing primer, however, not only  
102 anneals to the nucleotide sequence upstream of a deletion, but also  
103 anneals to the nucleotide sequence within the deletion region  
104 (Figure 1B). The mutant (deletion) sequencing primer has only one design,  
105 which primes across the deletion region (Figure 1B). In the absence of a deletion,  
106 the sequencing result will show one wild type nucleotide sequence ending with a  
107 cysteine. If there is a deletion, the sequencing result will show two nucleotide  
108 sequences, one generated by the wild type sequencing primer ending with a  
109 cysteine, and a shorter nucleotide sequence generated by mutant sequencing  
110 primer also ending with a cysteine. There are a number of different deletions in

111 EGFR. If the copies of the deletion alleles in the sample is more than 50%, a single  
112 sequencing primer (Non-selective) that anneals upstream of the deletion could be  
113 used to detect both the deletions and the wildtype. Depending on the number of  
114 deletions in the sample, a proportional number of deletion indicator signals will  
115 appear in the detection region. However, if specific deletions have low copies in the  
116 samples, one could use deletion specific sequencing primers that span across the  
117 specific deletion regions to increase the test sensitivity. These sequencing primers  
118 have different priming sites. Although at the proximal end of the sequences will not  
119 be distinguishable, at the distal end, the 'C' signal from the mutant will be among  
120 the TAA repeats, and hence could be detected.

121

## 122 *Samples*

123 The study included four categories of samples; DNA extracts from human cell lines obtained  
124 from Horizon Discoveries (Cambridge, UK), twenty-one de-identified blood samples from  
125 normal individuals, twenty-four de-identified DNA extracts that were previously tested by  
126 pyrosequencing, and twenty de-identified DNA extracts that were previously tested by TruSeq  
127 cancer panel. This manuscript is focused on technic method. All the samples have been de-  
128 identified. Therefore, IRB approval is not needed.

129

## 130 *Sample Preparation*

131 Total DNA was extracted from 1 ml of blood sample using DNeasy Blood and Tissue Kit  
132 (Qiagen, USA). The concentration of DNA ranged from 2.2 ng/ul to 9.7 ng/ul, and 10 ul of  
133 the DNA extract was used per reaction. DNA concentration of samples that were previously  
134 tested by TruSeq cancer panel ranged from 10ng/ul to 139 ng/ul. The samples were diluted  
135 1:3 in TE buffer and 10 ul of the diluent was used in the PCR reaction. DNA

136 concentration of samples that were previously tested by Pyrosequencing was not  
137 determined. Ten microliters of the diluent were used in the PCR reaction.

### 138 ***Amplification***

139 Two step PCR Each PCR reaction included 25.0  $\mu$ l of 2X buffer (MultiPlex PCR Master Mix,  
140 Qiagen). One microliter each of the 10 pmol forward and reverse primers ([Select](#)  
141 MultiGEN Diagnostics, USA) were added to the reaction with 10.0  $\mu$ l of the sample DNA  
142 extract. The first thermocycling was carried out at: 95°C/5min, (95°C/30sec, 57.5°C/90sec,  
143 72°C/30sec) x 20 cycles, 25°C/10min. Twenty-five microliters of Buffer 2 ([Select](#) MultiGEN  
144 Diagnostics Inc, USA) was added and second thermocycling with the above conditions was  
145 performed with 20 cycles. Following PCR clean-up with Ampure (Beckman, Agencourt USA),  
146 a sequencing reaction was set up using 1.0  $\mu$ l of Big dye, 9.5  $\mu$ l of 5X sequencing buffer, 1  
147 pmol of sequencing primer ([Select](#) MultiGEN Diagnostics, USA), 30  $\mu$ l of the purified PCR  
148 products and 4.5  $\mu$ l of Dnase free water to a total reaction volume of 50  $\mu$ l. Cycle Sequencing  
149 conditions: (96°C/105sec, 55°C/10sec, 60°C/2.5min) x 25 cycles. Cycle sequencing products  
150 were cleaned with CleanSEQ (Beckman Agencourt USA) and eluted in 40  $\mu$ l of Dnase free  
151 water. The cleaned products were injected for 16 seconds into ABI 3130xl Genetic Analyzer  
152 and the electropherogram was analyzed using Sequencing Analysis Software 6.0.

### 153 **Result analysis**

154 If there is no deletion, and using selective sequencing primer only, the single  
155 nucleotide sequence of the wild type will be displayed in the sequencing result  
156 with its specific read sequences (Figure 1C). If the sample carries cells with EGFR  
157 deletion, then there will be two nucleotide sequences; one from the wild-type  
158 sequence and other from that of EGFR deletion, and hence the nucleotide signal  
159 from both wild type and mutant will overlap for most part. Although at the  
160 beginning of the electropherogram the overlap of both the nucleotide sequences

161 could be scrambled and not readable, the nucleotide sequences at the distal end  
162 will display the detection region that is made up of adenosine thymidine-  
163 thymidine repetitive homopolymer sequence with cytosine at its distal end (Figure  
164 1D) . Since the nucleotide sequence from the deletion will be shorter, the  
165 indicator cytosine residue on the deletion sequence will move to the left on the  
166 electropherogram and will be in the midst of the thymidine-adenosine-adenosine  
167 repetitive homopolymer sequence detection region, thus the presence of deletion  
168 can be easily recognized and therefore confirmed.

169

## 170 **Limit of detection**

171

172 Limit of detection was determined using a known amount of human gDNA extracted from  
173 human cell line (HD 251). Stock solution of 5ug/ul was 1 in 10 serially diluted. Five microliters  
174 of diluted stock were used in a PCR reaction and the lower limit of detection was determined  
175 to be 1.47 copies per assay. (Table 1).

176

## 177 **Results and Discussion**

178

### 179 *Verification of Assay specificity*

180 The specificities of the deletion sequencing primer and the wild type sequencing primer were  
181 cross-checked using two DNA templates extracted from human cell lines (Horizon Discoveries  
182 Inc): HD 251 carrying 50% deletion and 50% wild type DNA, and HD 709 carrying  
183 100% wild type DNA. Various combinations of the sequencing primers and the templates were  
184 tested (Table 2). The wild type sequencing primer (selective) generated a wild type nucleotide



185 sequence when tested with wild type template HD 709 (Figure 1C). The wild type sequencing  
186 primer (Non-selective) generated a wild type nucleotide sequence and deletion sequence with  
187 heterozygous template (HD 251) that carries 50% wild type allele (Figure 1E). The deletion  
188 sequencing primer generated a deletion specific nucleotide sequence when tested with  
189 heterozygous template (HD 251) that carries 50% wild type allele (Figure 1F). However, the  
190 mutant sequencing primer did not generate any nucleotide sequence when tested with 100%  
191 wild type template HD 709 (Data not shown). Further, when mutant and wildtype (selective)  
192 sequencing primers were both included with wild type template (HD 709), only wild type  
193 specific and no deletion specific sequences were generated (Figure 1G). When both the wild  
194 type (selective) and the deletion sequencing primers were tested with heterozygous template  
195 (HD 251), the expected nucleotide sequences were generated, with the indicator signal for the  
196 deletion moving to the left of the wild type (Figure 1D).

197 The human genomic controls with 50% mutant allele template generated both wild type  
198 sequence and the deletion sequence. In addition, twenty-one normal blood samples were tested  
199 for EGFR deletion L747\_A750 by RepSeq technology using both deletion and wild type  
200 specific sequencing primers, and the results from all twenty-one samples generated only  
201 wild type sequence and no sequence indicative of deletion.

202

### 203 *Comparison with pyrosequencing*

204 Out of the twenty-four samples that were tested by pyrosequencing; both methods detected 15  
205 EGFR L747-A750 negatives and nine EGFR L747-A750 positives. (Table 3).

206

### 207 *Comparison with TruSeq*

208 Out of forty-four FFPE samples tested, RepSeq detected all seven EGFR L747-A750 positives and

209 thirty-seven EGFR L747-A750 negatives that were detected by TruSeq negatives. (Table 3).

210

### 211 *RepSeq features*

212 Similar to Sanger sequencing and pyrosequencing, the electropherogram from the wild type  
213 and the deletion are generated from the same set of PCR primers. However, unlike Sanger  
214 sequencing and pyrosequencing, RepSeq uses two sequencing primers; one for the wild type  
215 and the other for a deletion-specific sequencing primer that spans across the deletion region.  
216 This unique feature increases the signal intensity of that of the deletion that is in par with that  
217 of the wild type and therefore increases the test sensitivity. The lower PCR primer carries a  
218 three nucleotide (Adenosine-Thymidine-Thymidine) repetitive sequence with a  
219 guanidine nucleotide at its 5' end as an indicator of one end of the PCR product. Such a  
220 design make sequencing data interpretation much easier and faster.

221 This study used FFPE samples from late stage lung cancer where positive EGFR L747\_A750  
222 deletion samples will have an abundance of copies of the deletion, and hence had acceptable  
223 level of concordance among the three methodologies tested. Since RepSeq has a very low limit  
224 of detection compared to other two methods, it is expected to play a significant role in liquid  
225 biopsy and detection of EGFR 747\_A750 in early stages (< stage IV).

226

227 There are other additional deletions that are clinically significant. A second generation RepSeq  
228 -EGFR assay will have a combination of sequencing primers covering additional deletions. The  
229 RepSeq platform also could be applied to other clinically significant variations, such as ALK-  
230 EML4, ROS (9).

231

232 In summary, the EGFR RepSeq assay produces an easy to read electropherogram to detect

233 mutation in the presence of wild type, and enrichment using allele specific primers. Further,  
234 RepSeq also contains built-in features that address troubleshooting due to variations in sample  
235 matrix.

236

237

238

## References

- 239 1. Ladanyi M, Pao W. Lung adenocarcinoma: guiding EGFR-targeted therapy and beyond.  
240 Mod Pathol. 2008 May;21 Suppl 2: S16-22. doi: 10.1038/modpathol.3801018.
- 241 2. Soh J, Okumura N, Lockwood WW, Yamamoto H, Shigematsu H, Zhang W, Chari R,  
242 Shames DS, Tang X, MacAulay C, Varella-Garcia M, Vooder T, Wistuba II, Lam S,  
243 Brekken R, Toyooka S, Minna JD, Lam WL, Gazdar AF Oncogene mutations, copy  
244 number gains and mutant allele specific imbalance (MASI) frequently occur together in  
245 tumor cells. PLoS One. 2009 Oct 14;4(10): e7464. doi: 10.1371/journal.pone.0007464.
- 246 3. Pao W, Miller V, Zakowski M, Doherty J, Politi K, Sarkaria I, Singh B, Heelan R,  
247 Rusch V, Fulton L, Mardis E, Kupfer D, Wilson R, Kris M, Varmus H. EGF receptor  
248 gene mutations are common in lung cancers from "never smokers" and are associated  
249 with sensitivity of tumors to gefitinib and erlotinib. Proc Natl Acad Sci U S A. 2004  
250 Sep 7;101(36):13306-11. Epub 2004 Aug 25.
- 251 4. Yang Z, Hackshaw A, Feng Q, Fu X, Zhang Y, Mao C, Tang J Comparison of gefitinib,  
252 erlotinib and afatinib in non-small cell lung cancer: A meta-analysis. Int J Cancer. 2017  
253 Jun 15;140(12):2805-2819. doi: 10.1002/ijc.30691. Epub 2017 Mar 27.
- 254 5. Kenneth S. Thress<sup>a</sup> Roz Brant T. Hedley Carr<sup>c</sup> Simon Dearden<sup>d</sup> Suzanne Jenkins<sup>e</sup>  
255 Helen Brown<sup>d</sup> Tracey Hammett<sup>f</sup> Mireille Cantarini<sup>g</sup> J. Carl Barrett<sup>a</sup>. EGFR mutation  
256 detection in ctDNA from NSCLC patient plasma: A cross-platform comparison of  
257 leading technologies to support the clinical development of AZD9291. Lung Cancer  
258 Volume 90, Issue 3, December 2015, Pages 509-515.
- 259 6. Gillian Ellison, Guanshan Zhu, Alexandros Moulis, Simon Dearden, Georgina Speake,

- 260 Rose McCormack. *EGFR* mutation testing in lung cancer: a review of available  
261 methods and their use for analysis of tumour tissue and cytology samples. *J Clin Pathol*  
262 2013; 66:79–89. doi:10.1136/jclinpath-2012-201194
- 263 7. Martínez-Carretero C, Pascual FI, Rus A, Bernardo I Detection of EGFR mutations in  
264 patients with non-small cell lung cancer by high resolution melting. Comparison with  
265 other methods *Clin Chem Lab Med*. 2017 Oct 26;55(12):1970-1978. doi: 10.1515/cclm-  
266 2016-0353.
- 267 8. Sandrine Dufort, Marie-Jeanne Richard, Sylvie Lantuejoul, and Florence de Fraipont.  
268 Pyrosequencing, a method approved to detect the two major EGFR mutations for anti  
269 EGFR therapy in NSCLC *J Exp Clin Cancer Res*. 2011; 30(1): 57.
- 270 9. Takeuchi K, Soda M, Togashi Y, Suzuki R, Sakata S, Hatano S, Asaka R, Hamanaka  
271 W, Ninomiya H, Uehara H, Lim Choi Y, Satoh Y, Okumura S, Nakagawa K, Mano H,  
272 Ishikawa Y. RET, ROS1 and ALK fusions in lung cancer. *Nat Med*. 2012 Feb  
273 12;18(3):378-81. doi: 10.1038/nm.2658.

**Table 1. Lower limit of detection**

| Serial dilution | Copies/Rx (5ul) | Results                         |
|-----------------|-----------------|---------------------------------|
| Stock solution  | 147.2           | Positive for wild and L747_A750 |
| 1:10            | 14.7            | Positive for wild and L747_A750 |
| 1:100           | 1.47            | Positive for wild and L747_A750 |
| 1:1000          | <1.0            | Negative for wild and L747_A750 |
| 1:10000         | <1.0            | Negative for wild and L747_A750 |
| 1:100000        | <1.0            | Negative for wild and L747_A750 |

Note: Stock solution 5ng/ul

**Table 2. Primer specificity**

| Template |                     | Sequencing primer<br>(Selective) | Electropherogram       |
|----------|---------------------|----------------------------------|------------------------|
| Name     | Composition         |                                  |                        |
| HD251    | Mutant:Wild=50%:50% | Mutant                           | Mutant sequence        |
| HD709    | Wild=100%           | Mutant                           | Negative- No sequence  |
| HD251    | Mutant:Wild=50%:50% | Wild                             | Wild sequence          |
| HD709    | Wild=100%           | Wild                             | Wild sequence          |
| HD251    | Mutant:Wild=50%:50% | Mutant /Wild                     | Mutant & Wild sequence |
| HD709    | Wild=100%           | Mutant /Wild                     | Wild sequence          |

Note: HD Horizon Discoveries, UK

**Table 3. Comparison of RepSeq with Pyrosequencing and Truseq**

| Samples       |              |               | Results                |                |        |    |
|---------------|--------------|---------------|------------------------|----------------|--------|----|
| Test          | Type         | Number Tested | RepSeq                 | Pyrosequencing | TruSeq |    |
| Del L747-A750 | FFPE         | 24 (Pyroseq)  | Deletion and wild type | 9              | 9      | NA |
|               |              |               | Wild type only         | 15             | 15     | NA |
|               |              | 44 (TruSeq)   | Deletion and wild type | 7              | NA     | 7  |
|               |              |               | Wild type only         | 37             | NA     | 37 |
| Del L747-A750 | Normal blood | 21            | Deletion and wild type | 0              | NT     | NT |
|               |              |               | Wild type only         | 21             | NT     | NT |
| Total         |              | 89            |                        |                |        |    |



## Legend

Figure 1. RepSeq technology design and sequencing result.

Panel A: Diagrammatic representation of various elements of RepSeq technology.

Panel B: Showing the location of sequencing primers, deletion region lower primer and detection region.

Panel C: Electropherogram generated using wild type sequencing primer (selective) with homozygous DNA template HD 709.

Panel D: Electropherogram generated using wild type sequencing primer (selective) and deletion sequencing primers with heterozygous DNA template 251 carrying 50% deletion.

Panel E: Electropherogram generated using wild type sequencing primer (non -selective) with heterozygous DNA template 251.

Panel F: Electropherogram generated using deletion sequencing primer with DNA extracted from human cell line HD 251 carrying 50% deletion.

Panel G: Electropherogram generated using both deletion sequencing primer and wild type sequencing primers (selective) with homozygous DNA template HD 709.

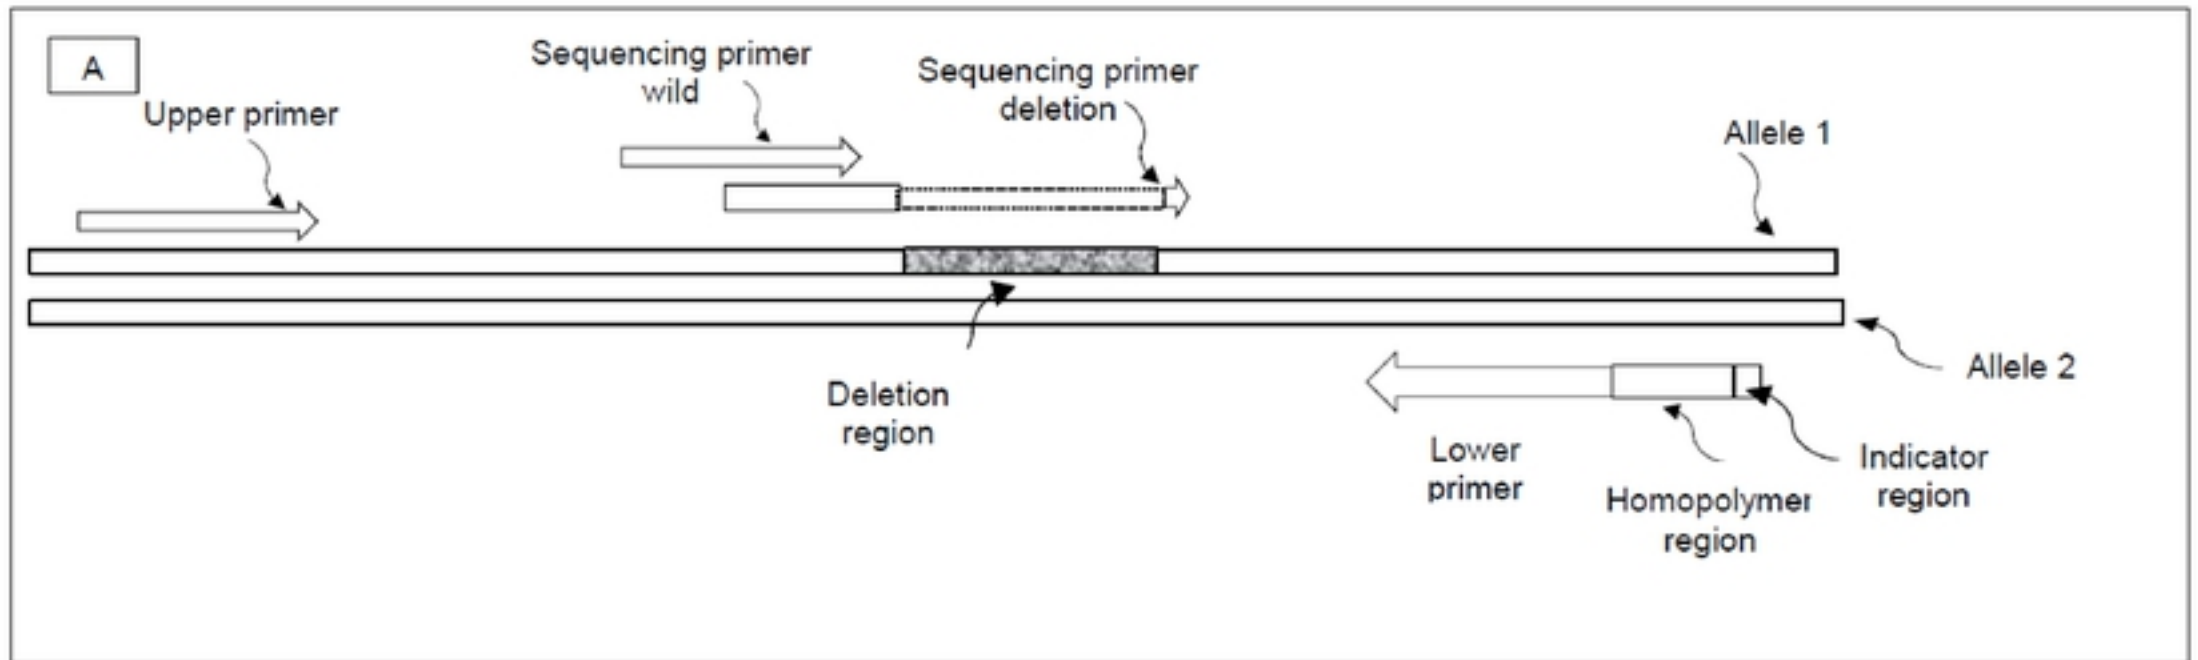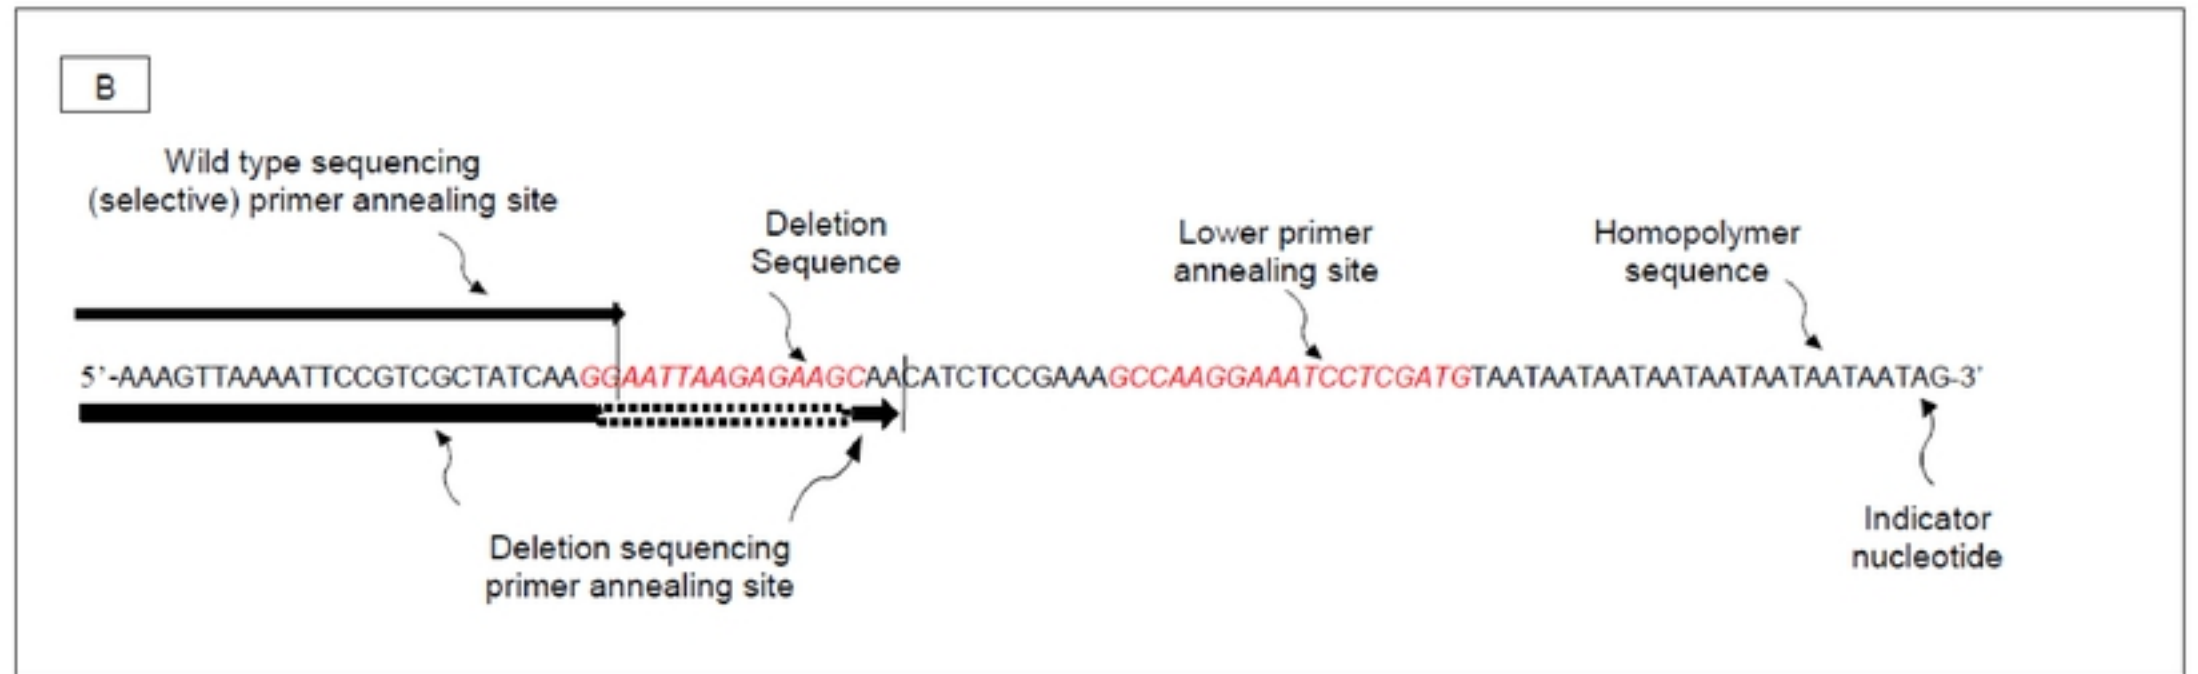

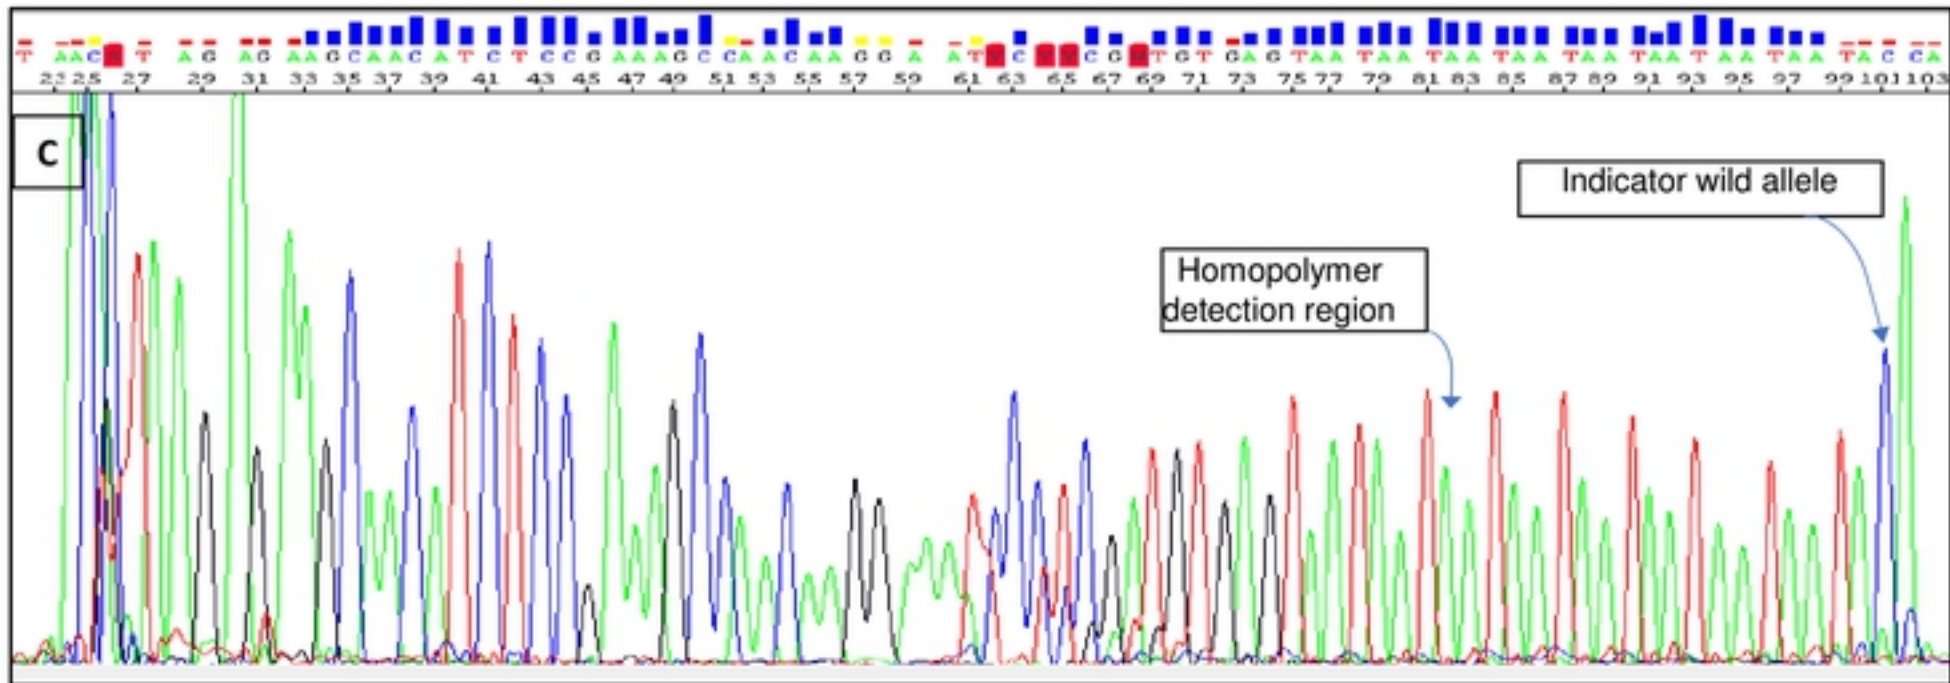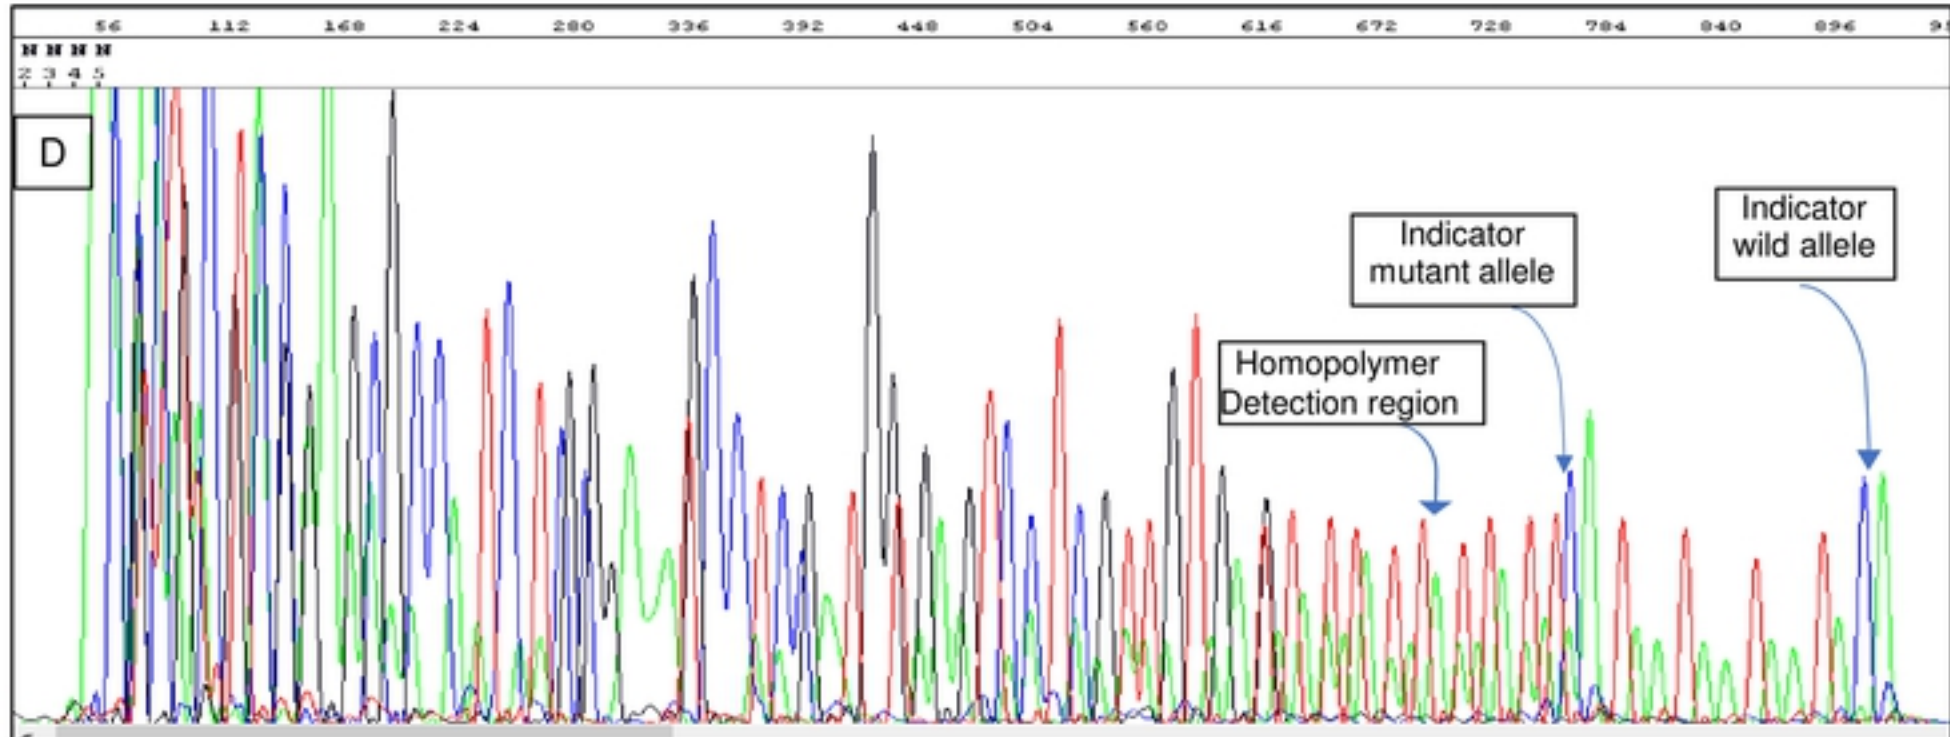

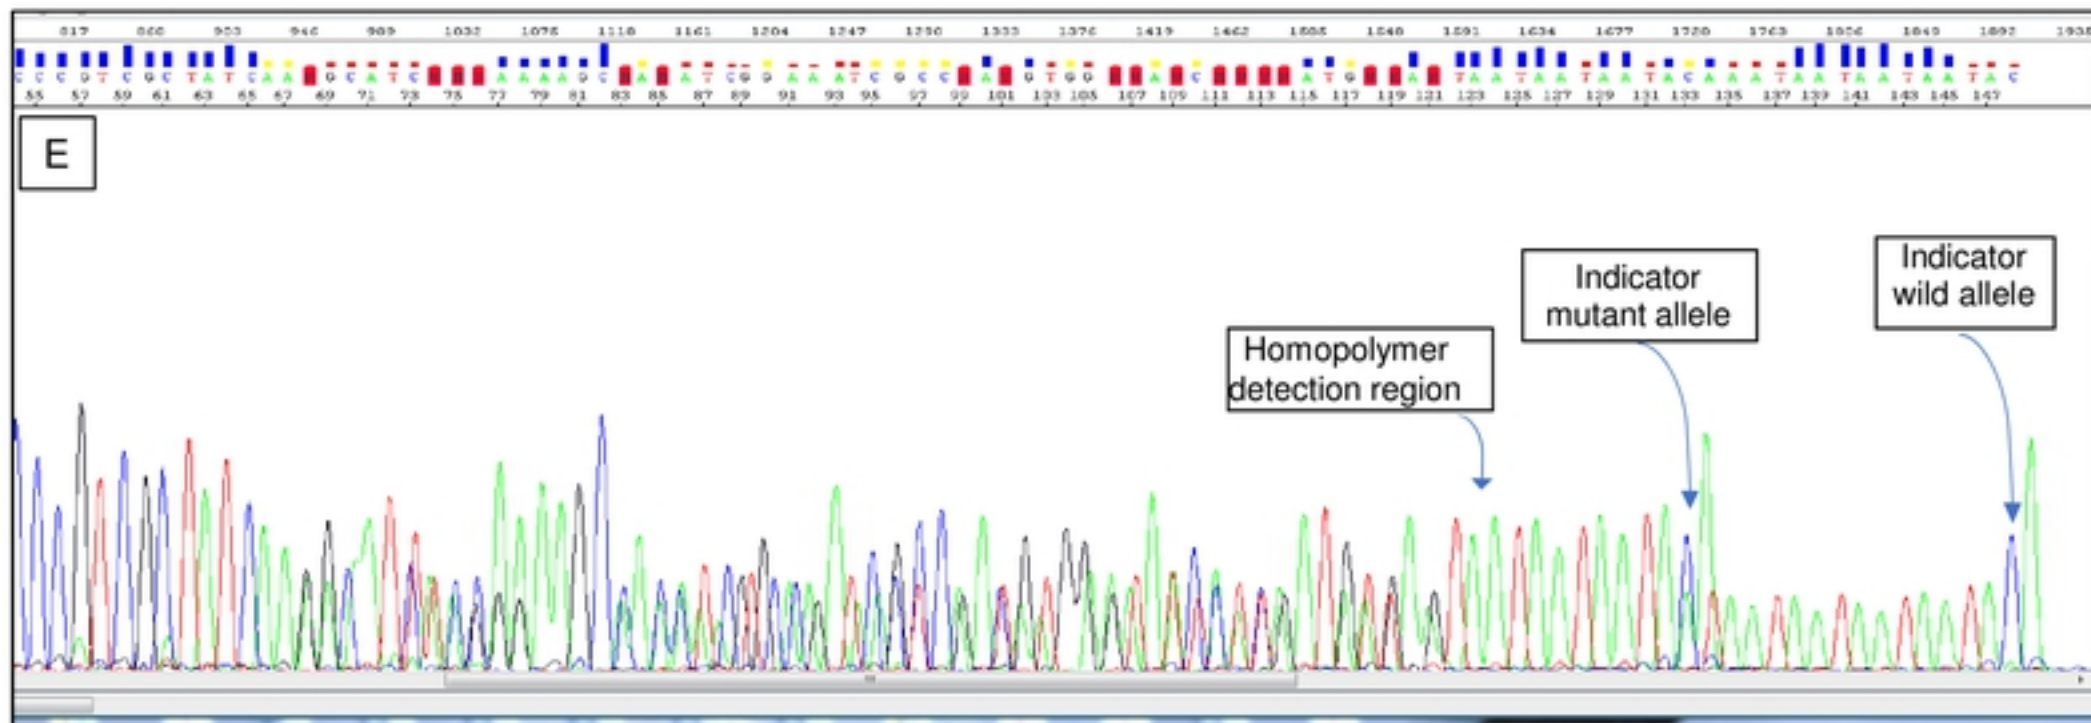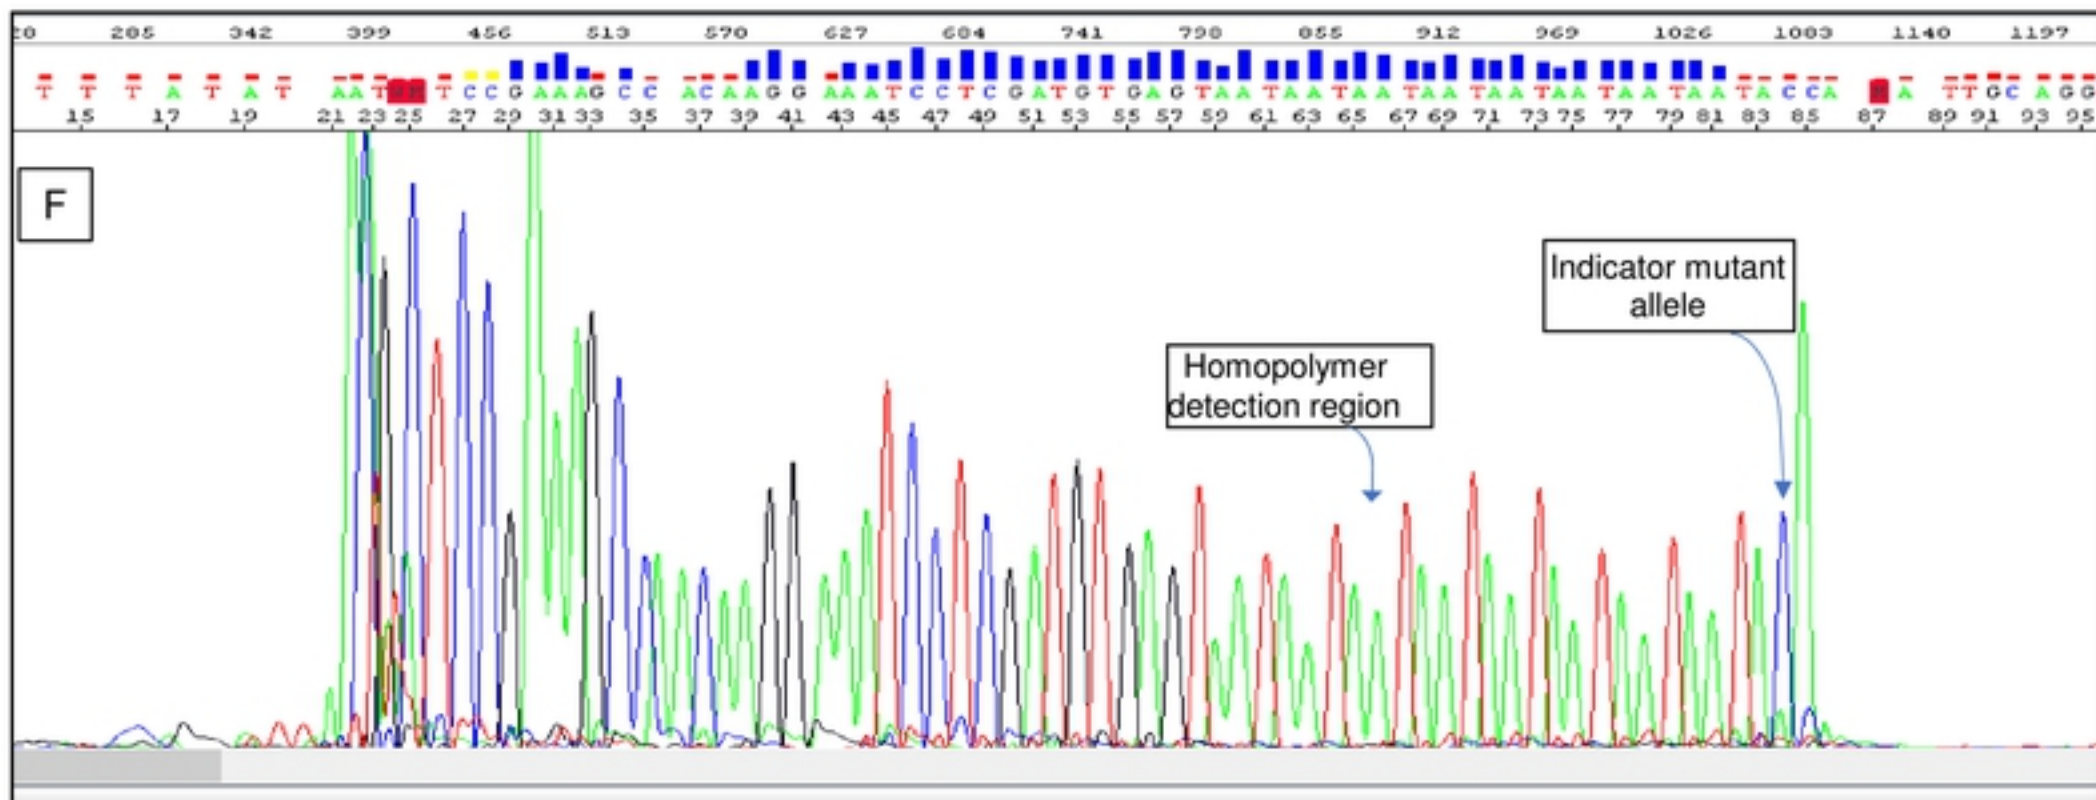

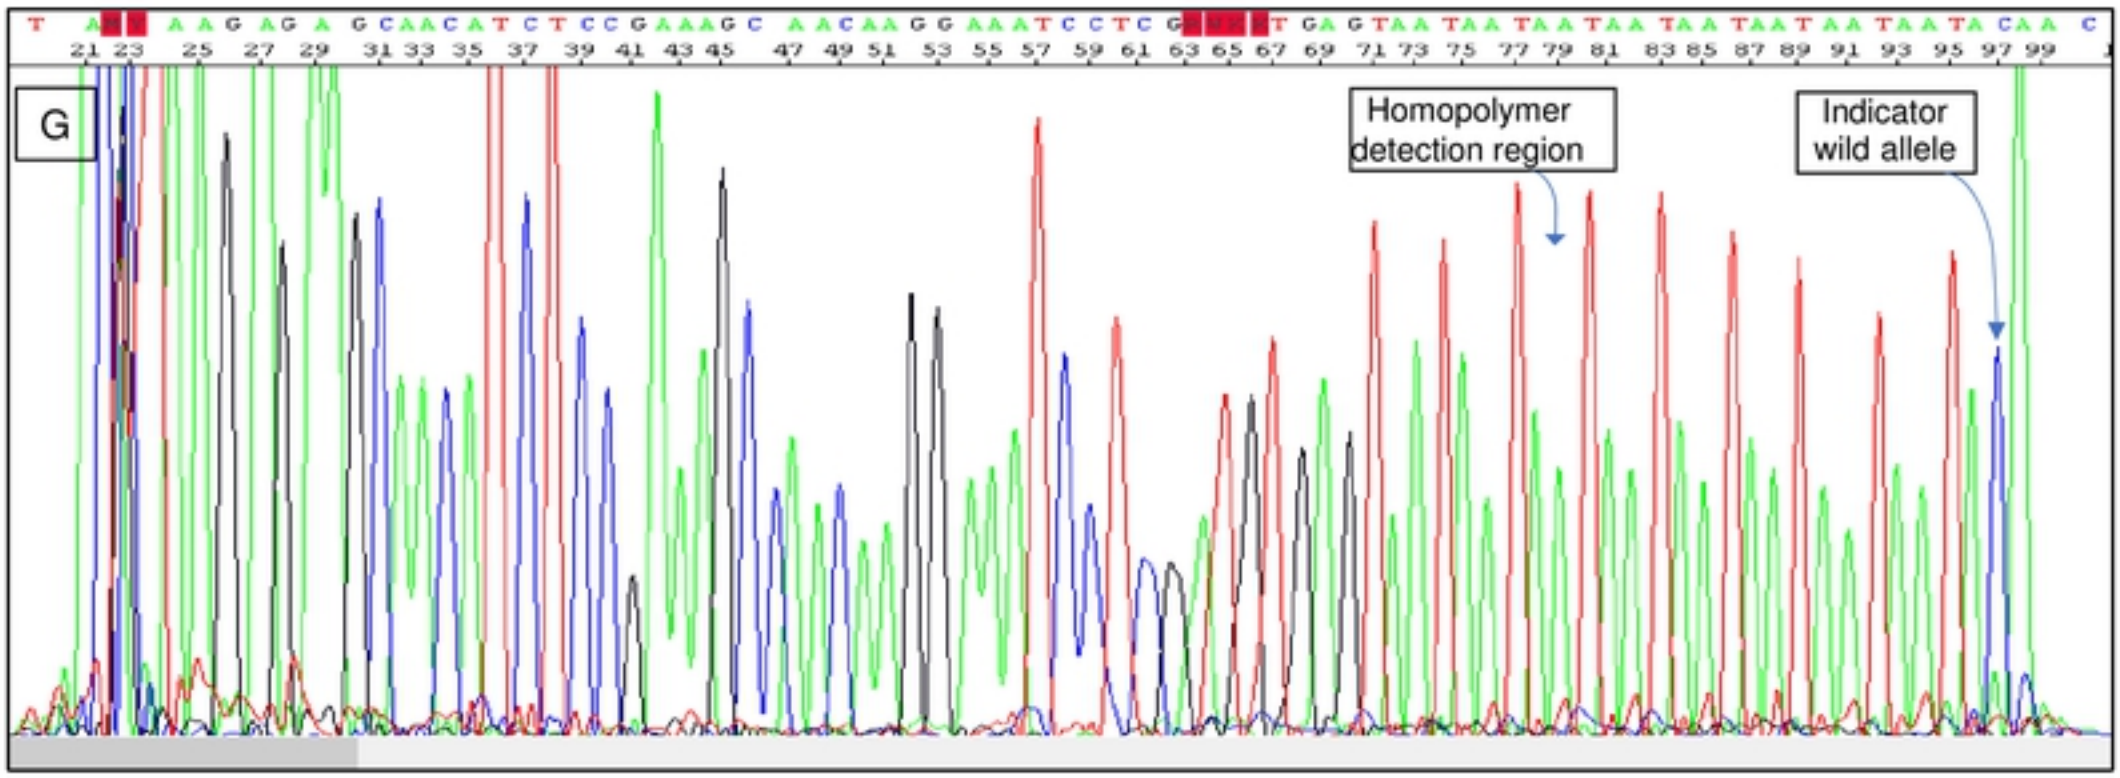

Source: http://biorxiv.org/content/10.1101/584045v1.full.pdf
